# Supplementary material for: Peritumor Edema Serves as an Independent Predictive Factor of Recurrence Patterns and Recurrence-Free Survival for High-Grade Glioma
Source: Hindawi journal article supplement (doi:10.1155/2022/9547166), 2022-07-27

**Supplementary figure 1.** Analysis of the relationship between clinical parameters and recurrence patterns.

**A**, Gender; **B**. Age; **C**. WHO pathological grade; **D**. Clinical treatment regimen. ns, no significant.


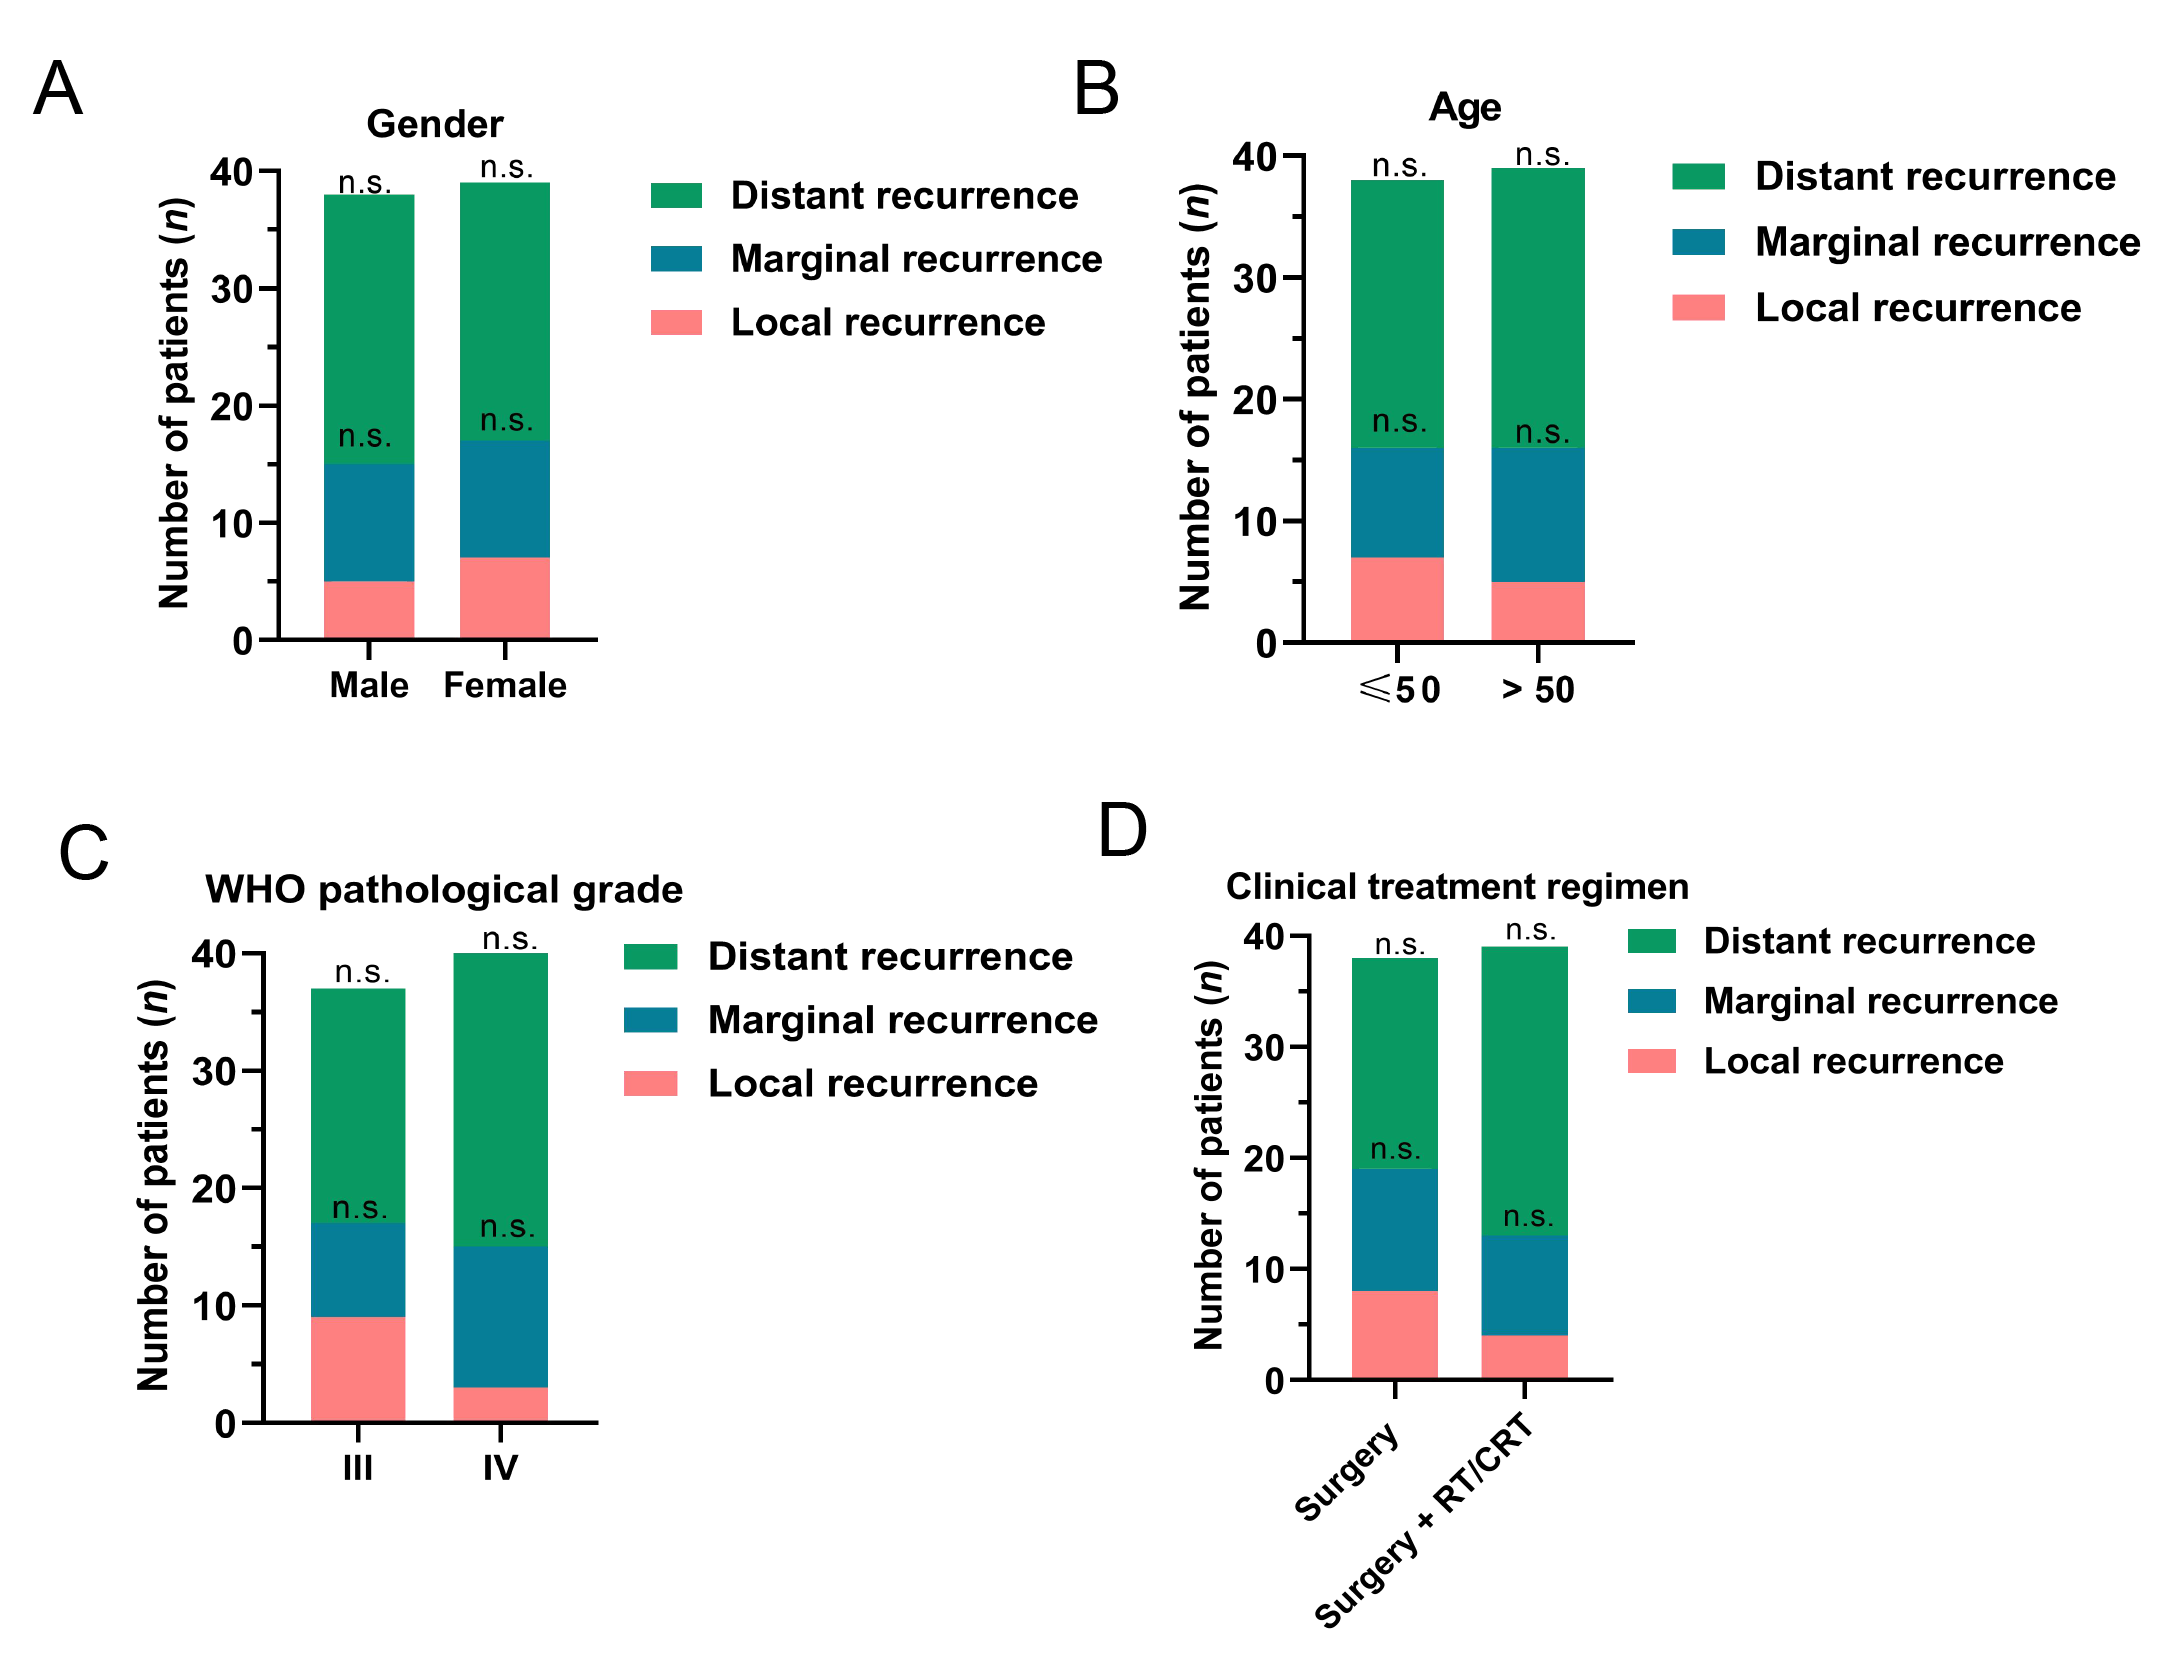

Supplement: f1 [file 9547166.f1.doc]
